# Supplementary material for: A temperature-sensitive, reusable PTA-AgNO 3 -CS supramolecular polymer for 3D printing and strain sensing
Source: Research Square preprint supplement (doi:10.21203/rs.3.rs-8804107/v1), 2026-02-24
Supplement: Supplementary file 1 [file 87e6f37c7070a87493afb0b0.docx]

**Supplementary material**

**A temperature-sensitive,** **reusable PTA-AgNO3-CS supramolecular polymer for 3D printing and strain sensing**

*Shengqiang Liao*1,#*, Miaomiao Jia*1,#*, Juncheng Wang*1*, Jiawen Liu*1*, Xianzhi Kong*2,**, Pengfei Huo*1,**, Jidong Dong*1,* *and Dawei Zhang*1,[[1]](#footnote-0)*

1 State Key Laboratory of Woody Oil Resources Utilization, Northeast Forestry University, Harbin 150040, People’s Republic of China

2 Institute of Petroleum Chemistry, Heilongjiang Academy of Sciences, Harbin 150040, People’s Republic of China


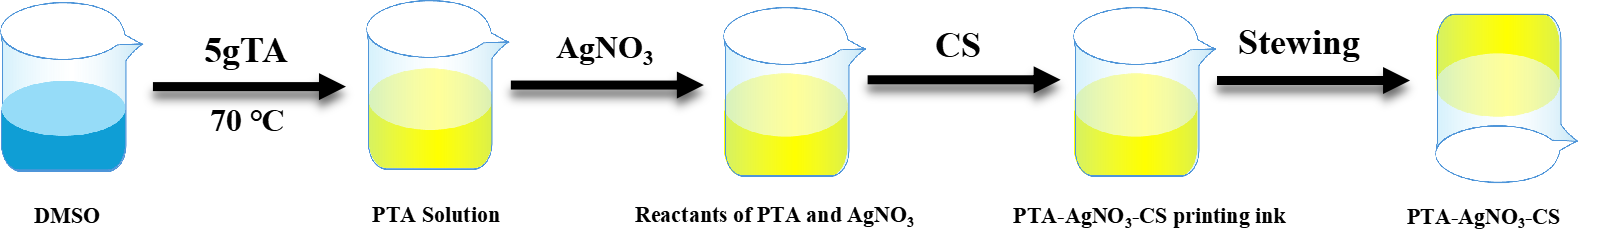


**Fig. S1** Schematic diagram of PAC supramolecular polymer preparation


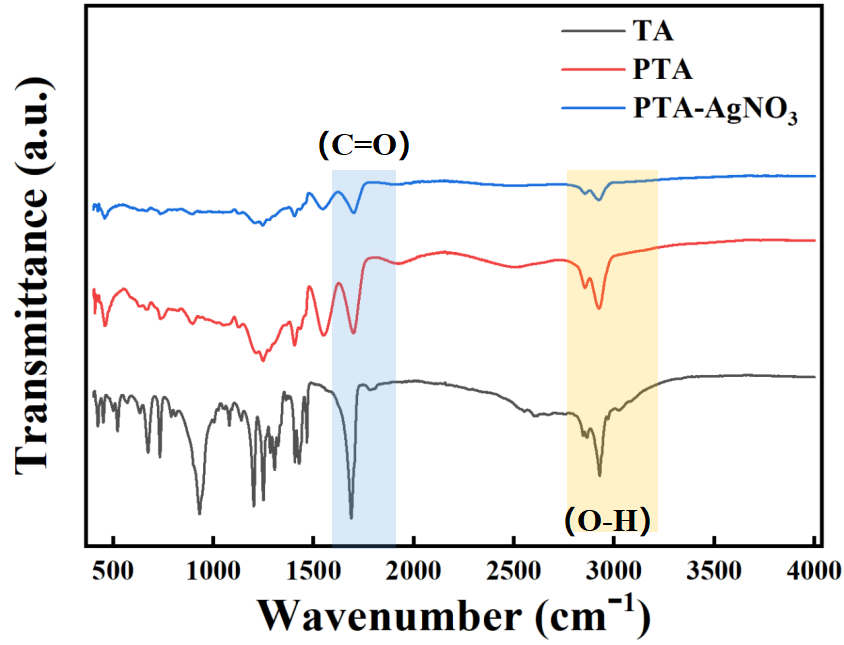


**Fig. S2** Infrared spectra of TA, PTA, and PTA-AgNO3


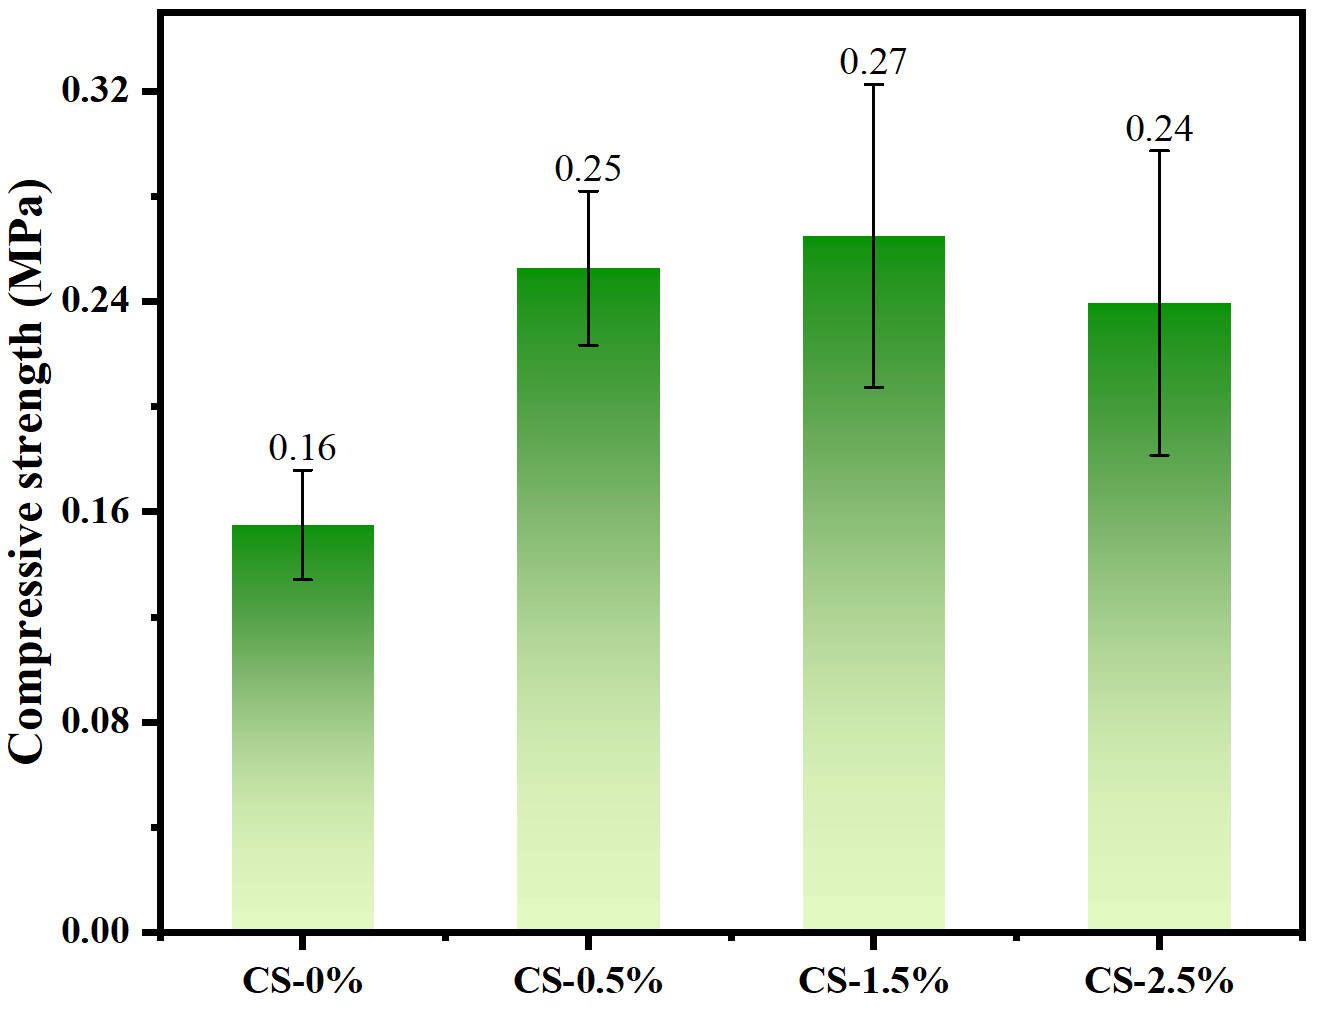


**Fig. S3** Compressive strength of PTA-AgNO3-CS supramolecular polymer with CS content.


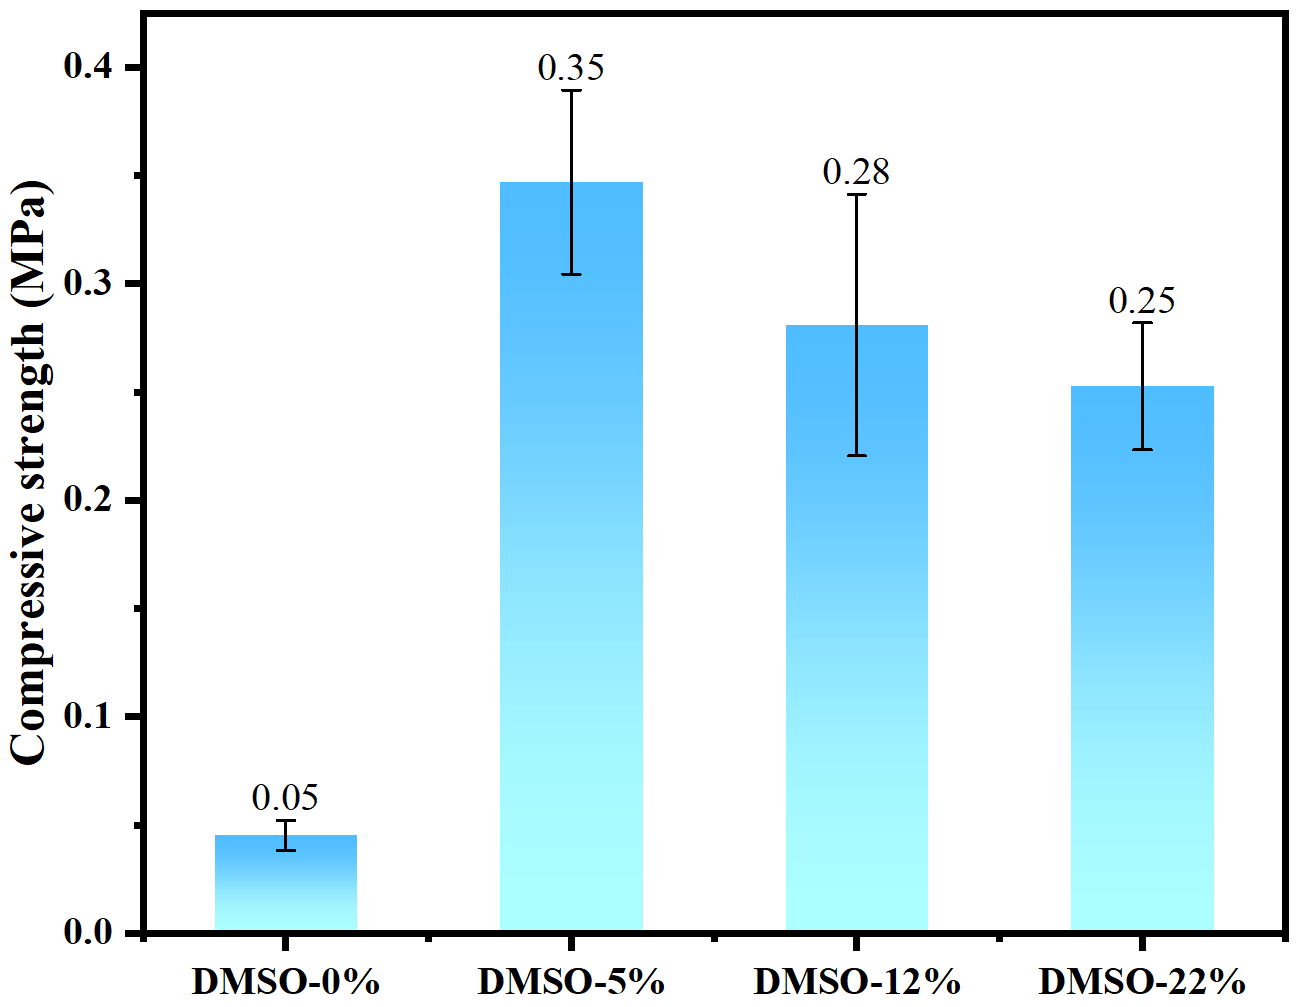


**Fig. S4** Compressive strength of PTA-AgNO3-CS supramolecular polymer with DMSO content


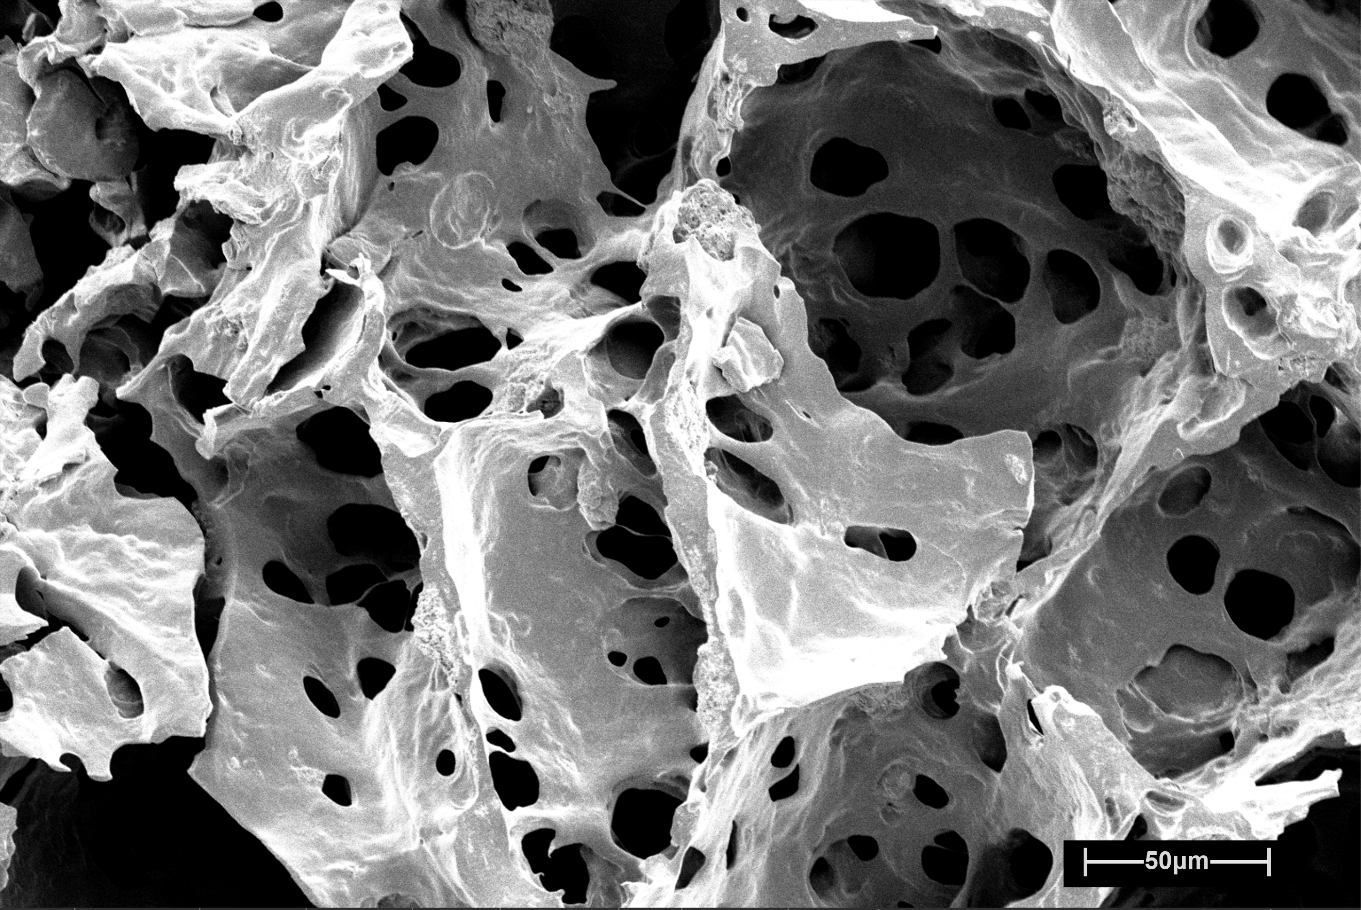


**Fig. S5** SEM image of PTA-AgNO3-CS supramolecular polymer


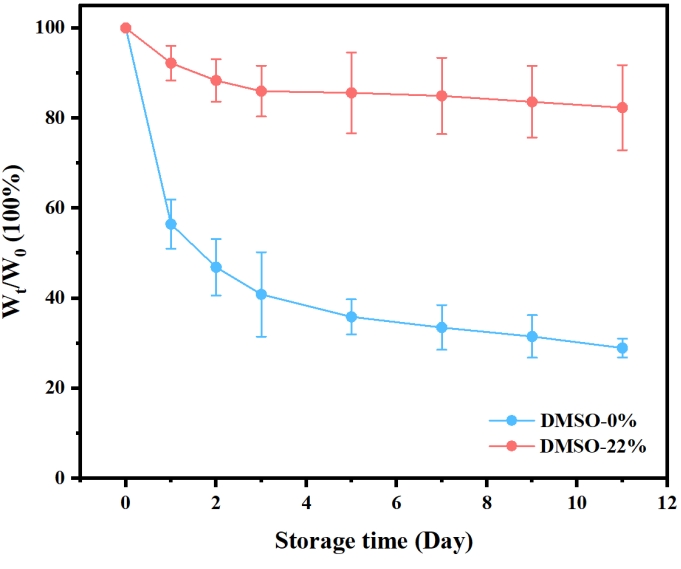


**Fig. S6** Weight variation curve of DMSO-0% and DMSO-22% PTA-AgNO3-CS supramolecular polymer stored at room temperature for 11 days


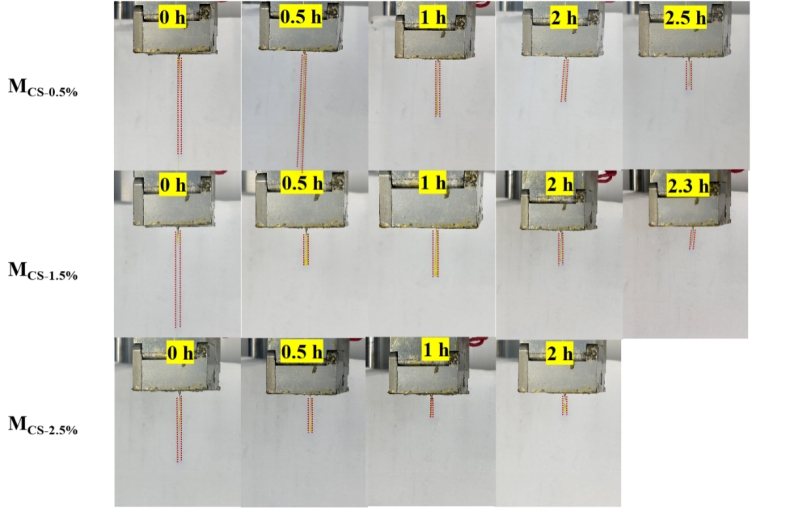


**Fig. S7** The filament drawing of MCS-0.5%, MCS-1.5% and MCS-2.5% printing inks after different crosslinking time

1. # Shengqiang Liao and Miaomiao Jia have contributed equally to the work.

   * Corresponding author. Xianzhi Kong: kongxianzhi2023@hipc.org.cn; Pengfei Huo: huopengfei@nefu.edu.cn; Jidong Dong: dongjidong@nefu.edu.cn and Dawei Zhang: zhangdawei@nefu.edu.cn [↑](#footnote-ref-0)
